# Supplementary material for: Nature of fatty acids in high fat diets differentially delineates obesity-linked metabolic syndrome components in male and female C57BL/6J mice
Source: Springer Nature journal article supplement (doi:10.1186/1758-5996-3-34), 2011-12-01
Supplement: Additional file 1 [file 1758-5996-3-34-s1.doc]

**Additional table 1. Relationship between weight gain and hemodynamic parameters.**

|  | Leptin mRNA level (n=8) | Leptin (n=8) | Adiponectin mRNA level (n=8) | Adiponectin (n=8) |
| --- | --- | --- | --- | --- |
| Leptin (n=8) | r* = 0.83  p < 0.0001 | r[[1]](#footnote-2) = 1 | --- | r* = -0.35  p = 0.1647 |
| Adiponectin (n=8) | --- | r* = -0.35  p = 0.1647 | r* = 0.59  p = 0.0764 | r* = 1 |
| Weight gain (n=8) | r* = -0.93  p < 0.0001 | r* = 0.88  p < 0.0001 | r* = -0.73  p < 0.01 | r* = -0.63  p = 0.0918 |
| Glycaemia (n=8) | r* = 0.27  p = 0.0872 | r* = 0.13  p = 0.5060 | r* = -0.35  p < 0.05 | r* = -0.22  p = 0.2946 |

**Additional table 2 Biological parameters for all mouse groups.**

|  | **SD** | |  | **VD** | |  | **AD** | |
| --- | --- | --- | --- | --- | --- | --- | --- | --- |
| **Male** | **Female** | **Male** | **Female** | **Male** | **Female** |
| BW0 (g) | 18.60±0.50 | 15.70±0.40a |  | 18.70±0.40 | 16.10±0.20a |  | 17.10±0.30 | 16.07±0.20 |
| BW20 (g) | 30.31±1.03 | 21.98±0.24a |  | 46.83±1.37b | 34.69±0.69a,b |  | 40.34±0.89b,c | 36.40±1.16b |
| BWG (g) | 11.84±0.92 | 6.00±0.20a |  | 28.08±1.25b | 18.70±0.82a,b |  | 23.88±0.61b | 20.52±1.17b |
| FI (g/day) | 3.50±0.05 | 3.60±0.09 |  | 2.80±0.17b | 2.70±0.76b |  | 2.40±0.12b | 2.30±0.51b |
| FI (kCal/day) | 10.15±0.10 | 10.44±0.29 |  | 12.88±0.60 | 12.42±2.76 |  | 12.48±0.5 | 11.96±2.60 |
| vWAT (g) | 3.90±0.14 | 2.30±0.11 |  | 8.40±0.88b | 4.90±0.15a,b |  | 15.20±1.15b,c | 11.20±0.49a,b,c |
| vWAT (% of BW20) | 12.94±0.71 | 10.61±0.60 |  | 17.83±1.56 | 14.03±0.50a |  | 37.40±2.35b,c | 26.00±1.05a,b,c |

Abbreviations: BW0 = body weight at the start of the protocol; BW20 = body weight at the end of the protocol after 20 weeks of diet; BWG = body weight gain between the beginning and the end of the protocol; FI = food intake; vWAT, visceral white adipose tissue weight. a = significant differences (P<0.05) between sexes within diet; b = significant differences (P<0.05) between diets within sex compared to SD group; c = significant differences (P<0.05) between diets within sex compared to VD group. Data are shown as means±SEM.

**Additional figure 1. TNFα gene expression profile.** TNFα mRNA expression levels in abdominal visceral white adipose tissue extracted from male and female (n=8) of SD, VD and AD mice groups. mRNA expression level was evaluated by Q-PCR and reported as a ratio over the expression level of the reference gene Cyclophilin-A. *P<0.05, ***P<0.001 vs. SD; ###P<0.001 vs. VD.


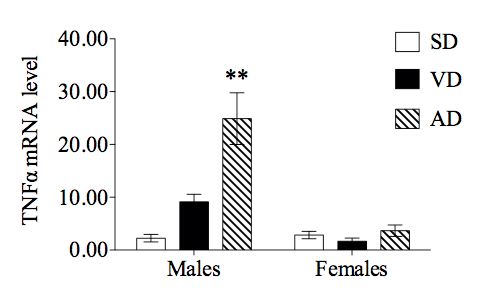


1. Pearson or Spearman correlations depending distribution of the data [↑](#footnote-ref-2)
